# Supplementary material
Source: PubMed Central journal article supplement (PMC5727817)
Supplement: ba004408-suppl1.pdf [file ba004408-suppl1.pdf]

## Supplemental Figure 1

**A**

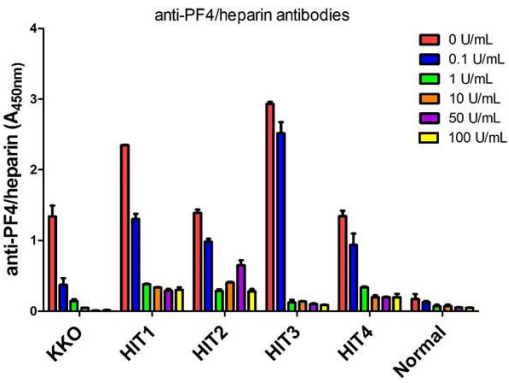

**B**

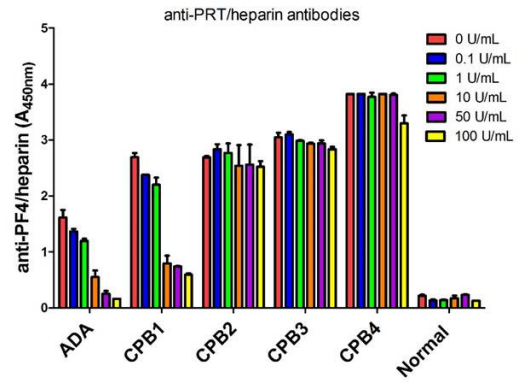

**Supplemental Figure 1: Heparin-dependent reactivity of monoclonal and polyclonal antibodies to PF4/heparin and PRT/heparin complexes.** In order to demonstrate binding of anti-PF4/heparin (**Panel A**) and anti-PRT/heparin antibodies (**Panel B**) to PF4/heparin and PRT/heparin in the absence of excess heparin (0 units/mL), data presented in Figure 2 is depicted in column graph format. All data shown are representative of 3 independent determinations.

Supplemental Figure 2

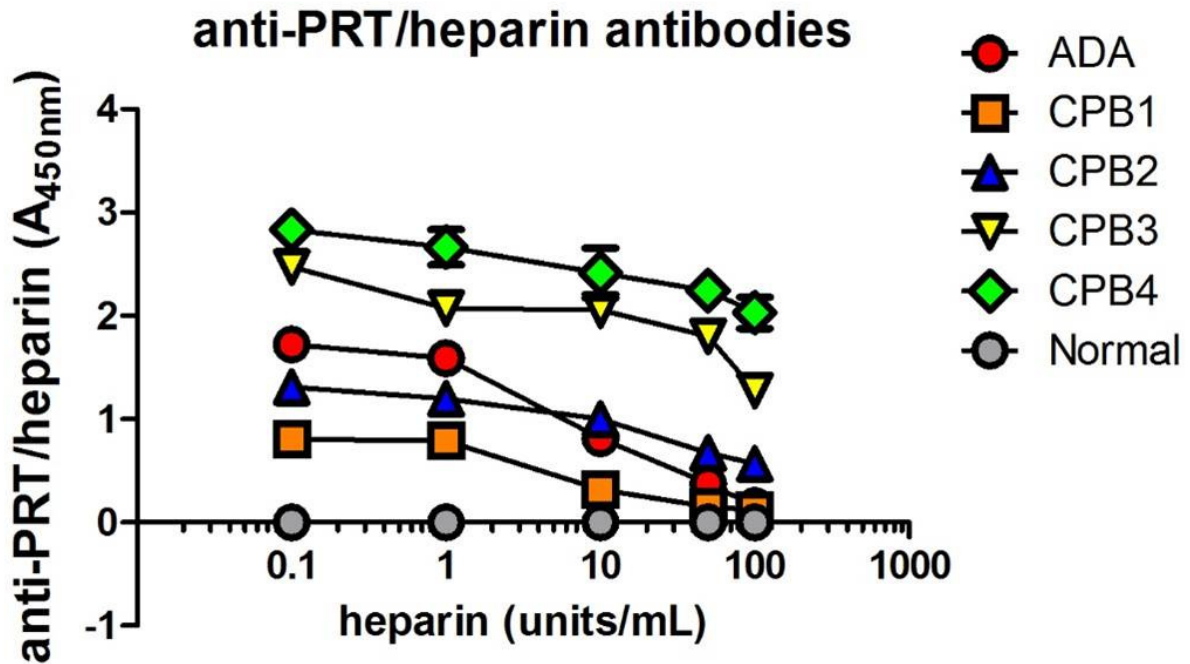

**Supplemental Figure 2: Heparin-dependent reactivity of ADA and patient-derived PRT/heparin antibodies to PRT/heparin in the presence of excess heparin at a higher dilution.** As described in Figure 2B, ADA 100 ng/mL, patient-derived PRT/heparin antibodies (CPB 1-4) or normal plasma were incubated in microtiter wells coated with PRT/heparin complexes either in buffer or buffer supplemented with increasing concentrations of unfractionated heparin (0.1-100 U/mL). CPB samples and normal plasma were diluted to 1:2000. The pattern of antibody binding at 1:2000 was similar to that seen in Figure 2B at a 1:500 dilution. Mean absorbance of duplicate wells is shown on the y-axis. All data shown are representative of 3 independent determinations.

### Supplemental Figure 3

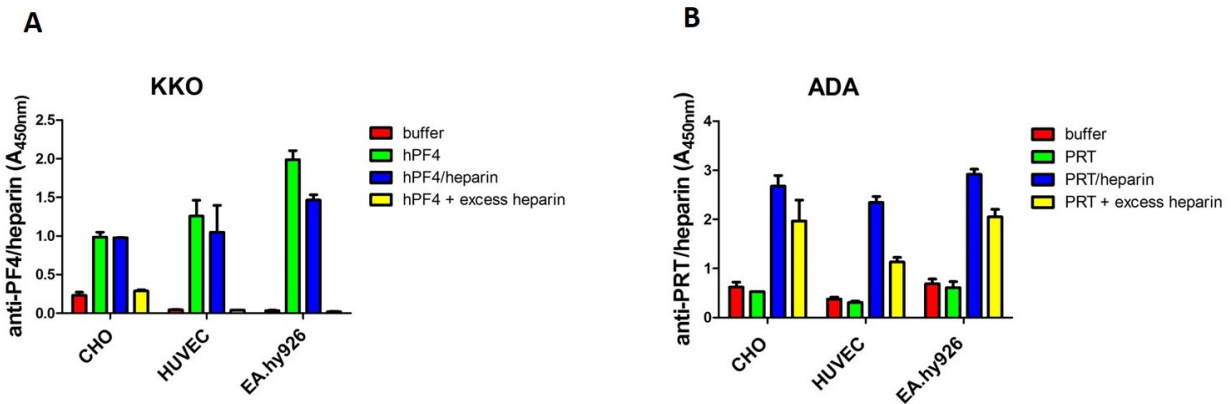

**Supplemental Figure 3: Binding of KKO and ADA to cell-surface GAGs. (A) Binding of KKO to cell-surface GAGs.** Fixed cells (CHO, HUVEC, or EA.hy926 cells) were incubated with buffer, human PF4 (hPF4, 10  $\mu\text{g}/\text{mL}$ ), or hPF4/heparin complexes (10  $\mu\text{g}/\text{mL}$  : 0.4 units/ $\text{mL}$ ) for one hour at room temperature. After washing, microtiter wells were incubated with KKO 50 ng/ $\text{mL}$  in buffer or in buffer containing excess heparin (100 units/ $\text{mL}$ ). **(B) Binding of ADA to cell-surface GAGs.** As described in (A), fixed cells were incubated with buffer, PRT 31  $\mu\text{g}/\text{mL}$ , or PRT/heparin complexes (31  $\mu\text{g}/\text{mL}$  : 4 units/ $\text{mL}$ ) followed by ADA 1.25  $\mu\text{g}/\text{mL}$  in buffer or in buffer containing excess heparin (100 units/ $\text{mL}$ ). All data shown are representative of 3 independent determinations.

**Supplemental Table 1: Clinical information**

|             | Age       | Sex      | Heparin exposure during hospitalization        | Relevant medical history                                       | Complications during hospitalization                                                  | Prior cardiac surgery |
|-------------|-----------|----------|------------------------------------------------|----------------------------------------------------------------|---------------------------------------------------------------------------------------|-----------------------|
| <b>HIT1</b> | <b>60</b> | <b>M</b> | <b>CABG</b>                                    | <b>none</b>                                                    | <b>Bilateral hand/digit ischemia, left lower extremity DVT, PE, cardiogenic shock</b> | <b>none</b>           |
| <b>HIT2</b> | <b>58</b> | <b>M</b> | <b>cardiac catheterization, IABP placement</b> | <b>none</b>                                                    | <b>PE</b>                                                                             | <b>none</b>           |
| <b>HIT3</b> | <b>53</b> | <b>M</b> | <b>LVAD placement</b>                          | <b>ischemic cardiomyopathy</b>                                 | <b>none</b>                                                                           | <b>none</b>           |
| <b>HIT4</b> | <b>58</b> | <b>F</b> | <b>LVAD placement</b>                          | <b>ischemic cardiomyopathy</b>                                 | <b>none</b>                                                                           | <b>none</b>           |
| <b>CPB1</b> | <b>57</b> | <b>F</b> | <b>CABG</b>                                    | <b>history of PVD requiring revascularization and stenting</b> | <b>no clinical follow-up available</b>                                                | <b>none</b>           |
| <b>CPB2</b> | <b>63</b> | <b>M</b> | <b>CABG</b>                                    | <b>none</b>                                                    | <b>none</b>                                                                           | <b>none</b>           |
| <b>CPB3</b> | <b>55</b> | <b>F</b> | <b>CABG</b>                                    | <b>none</b>                                                    | <b>none</b>                                                                           | <b>none</b>           |
| <b>CPB4</b> | <b>30</b> | <b>F</b> | <b>MV repair</b>                               | <b>none</b>                                                    | <b>no clinical follow-up available</b>                                                | <b>none</b>           |

CABG, coronary artery bypass grafting; DVT, deep vein thrombosis; PE, pulmonary embolism; IABP, intra-aortic balloon pump; LVAD, left ventricular assist device; PVD, peripheral vascular disease; MV, mitral valve
